# Supplementary material for: Global analysis of transcriptionally engaged yeast RNA polymerase III reveals extended tRNA transcripts
Source: HighWire-hosted journal article supplement (doi:10.1101/gr.205492.116), 2016-05-20
Supplement: Supplemental_Table_S1.xlsx [file Supplemental_Table_S1.xlsx]

## Sheet: A - no_of_mapped_reads
Supplemental Table S1A Turowski et al.
A. No of mapped reads
	sample name	mapped reads	total reads
BY4741	BY4741	16729	45666
glucose 30°C (wt)	C160HTP_wt_glu_1	4465117	5752839
		mapped reads	total reads
glucose 30°C (wt)	C160HTP_wt_glu_2	855251	1096701
glucose 30°C (maf1Δ)	C160HTP_wt_gly_2	1238638	1622949
glycerol 37°C (wt)	C160HTP_maf1_glu_2	44238	61606
glycerol 37°C (maf1Δ)	C160HTP_maf1_gly_1	1829513	2325883

## Sheet: B - shortcut
Supplemental Table S1B Turowski et al.
B. Table shortcut
C160HTP_wt_glu_1
Gene(s)	no. of reads
## tRNA	3770731
(...) 275 genome encoded tRNA genes	3770691
(...) 13 mitochondrial tRNA genes	40
## rRNA	664912
(...) 6 genes encoding 5S rRNA	462192
(...) 2 genes encoding 35S pre-rRNA	102013
(...) 2 genes encoding mitochondrial rRNA	546
## ncRNA	49276
(...) 3 known RNAPIII transcripts	49147
(...) 9 other mapped transcripts	129
## snRNA	16618
SNR6 (RNAPIII transcript)	16386
(...) 5 other mapped transcripts	232
## snoRNA	13964
SNR52 (RNAPIII transcript)	8399
(...) 70 other mapped transcripts	5565
all mapped reads	4465117

## Sheet: C - short_table
Supplemental Table S1C Turowski et al.
C. Table short version
C160HTP_wt_glu_1
	sense_overlap	anti-sense_overlap	number of reads
## tRNA	3770731	48183
tS(GCU)F	33689	0	10921
(...) 275 genes	(...)	(...)	(...)
tD(GUC)N	3005	10	1930
tV(UAC)Q	10	0	8
tE(UUC)Q	6	3	7
tF(GAA)Q	6	0	5
tW(UCA)Q	5	0	5
tT(UGU)Q1	4	0	4
tC(GCA)Q	4	0	4
tH(GUG)Q	1	0	1
tI(GAU)Q	1	0	1
tA(UGC)Q	1	0	1
tY(GUA)Q	1	0	1
tD(GUC)Q	1	0	1
tQ(UUG)Q	0	3	1
tL(UAA)Q	0	3	1
## rRNA	664912	761
RDN5-1	81667	69	30484
RDN5-6	79708	424	29681
RDN5-3	75581	8	28004
RDN5-4	75407	1	27788
RDN5-2	75112	13	27929
RDN5-5	74717	5	27788
RDN37-1	51258	60	24104
RDN37-2	50755	68	23887
RDN25-1	27367	22	12028
RDN25-2	27113	16	11862
RDN18-1	20763	9	10222
RDN18-2	20603	27	10203
RDN58-1	2166	16	1355
RDN58-2	2149	13	1329
21S_RRNA	344	10	222
15S_RRNA	202	0	141
## protein_coding	137788	410472
MTC7	16041	0	3908
YNL042W-B	11234	2	6328
YDR278C	10999	0	5250
YDR445C	9123	1	4548
YPR108W-A	8399	0	3652
YOL013W-A	8357	9	4363
YOR072W-B	7193	2	4170
YHR145C	6257	3	2316
YHR180W-A	6115	0	2837
YER097W	2955	0	1608
YLR154C-G	1550	0	913
CIS1	940	1	582
EST3	799	0	434
RAD7	435	2	272
## ncRNA	49276	44
SCR1	35089	1	12238
RPR1	13925	0	6091
RNA170	133	0	91
TLC1	116	3	65
ICR1	6	0	3
RUF21	4	1	3
RUF20	2	0	2
RUF22	1	3	4
PWR1	0	6	3
RUF5-2	0	13	10
HRA1	0	1	1
RUF5-1	0	16	13
## snRNA	16618	5
SNR6	16386	0	7088
SNR14	100	2	54
LSR1	65	0	43
SNR7-L	41	0	28
SNR7-S	20	0	17
SNR19	6	3	7
## snoRNA	13964	371
SNR52	8399	1	4411
SNR86	457	1	280
SNR40	393	0	170
SNR190	372	0	176
SNR37	298	0	166
SNR17A	271	0	204
SNR189	227	0	136
## pseudogene	98	56
YNL054W-B	54	10	61
YLL017W	33	0	8
SDC25	4	1	5
YPL060C-A	2	18	5
YDR134C	2	0	2
YAR061W	2	0	1
YIR043C	1	1	2
YIL080W	0	25	13
YOL153C	0	1	1

## Sheet: Pol III transcripts only
Supplemental Table S1 Turowski et al.
only Pol III transcripts
C160HTP_wt_glu_1
# generated by Counters version 1.2.6, Mon Aug 17 14:08:07 2015
# /usr/local/bin//pyReadCounters.py -f glu_wt_C2.novo --gtf=Saccharomyces_cerevisiae.EF4.74.shortChNames_with_PolIII_transcripts_extended_slop_intergenic_sort.gtf
# total number of reads	5752839
# total number of mapped reads:	4465117
# total number of paired reads	0
# total number of single reads	4465117
# total number of reads without overlapping features:	0
# total number of overlapping genomic features	9529972
#	sense	4933118
#	anti-sense	4596854
# feature	sense_overlap	anti-sense_overlap	number of reads
## tRNA	3770731	48183
tS(GCU)F	33689	0	10921
tS(AGA)G	32414	0	10871
tV(UAC)B	29651	0	9902
SUP61	27154	0	9434
tR(ACG)O	26537	5	7001
tI(AAU)B	26184	7439	12188
tV(UAC)D	26078	0	10060
tS(AGA)E	25540	0	7708
tS(AGA)A	25447	1	8756
tS(AGA)H	24811	0	8016
tL(GAG)G	24489	6302	11755
tL(UAG)L2	24423	0	7561
tT(AGU)I1	24395	2	7861
tR(ACG)K	23826	7	7878
tL(UAG)L1	23505	0	7198
tA(UGC)A	23488	10	8077
tS(AGA)M	23362	0	7462
tS(AGA)L	23319	0	7551
tL(UAG)J	22923	0	6817
HSX1	22893	1	6727
tI(AAU)P1	22662	4	7682
tR(ACG)D	22621	6	7340
tL(UAA)B2	22408	1	6542
tT(AGU)D	21919	1	8657
SUP19	21844	5	7440
tT(AGU)I2	21336	0	7315
SUP2	20943	0	8737
tR(UCU)D	20787	2	8847
tN(GUU)K	20598	0	6306
tS(AGA)D2	20372	3	7490
SUP16	20222	7	6273
tI(AAU)N2	20217	6	7392
tI(AAU)E2	20142	7	7433
tR(ACG)L	20123	7	7764
tS(AGA)J	19941	1	6827
tI(AAU)N1	19768	10	6714
tS(AGA)D1	19524	0	6652
tI(AAU)I2	19434	7	7447
tA(UGC)E	19409	0	7568
tN(GUU)O2	19027	0	6492
tT(AGU)H	18987	0	6934
tR(ACG)E	18755	5	6411
tR(UCU)G3	18511	2	5712
TRT2	18484	0	6954
tT(AGU)B	18467	0	6318
tT(AGU)N1	18398	0	6671
tL(CAA)M	18122	14	7276
tD(GUC)I2	18023	0	7589
tH(GUG)G2	18009	0	8532
tS(GCU)O	18004	0	8023
tS(AGA)B	17876	0	7088
tR(UCU)J2	17807	3	8506
SUP54	17583	2	7142
tS(GCU)L	17441	0	6247
tH(GUG)G1	17335	25	7087
SUP4	17309	0	6488
tR(UCU)J1	17227	2	8312
SUP8	17056	0	6191
tR(UCU)B	17048	2	8055
tT(AGU)N2	16907	0	5794
SUP7	16862	0	6986
tX(XXX)D	16858	0	6438
tL(UAA)L	16714	3	5593
tI(AAU)L1	16677	7	6087
tT(AGU)O1	16650	0	4725
tN(GUU)N2	16620	0	5871
tL(UAA)D	16600	4	5309
tT(AGU)C	16523	0	6914
tL(CAA)D	16472	0	7619
SUP11	16440	0	7014
SUP6	16365	0	6956
tV(AAC)M2	16254	1	7168
tI(AAU)I1	16104	10	5780
tR(ACG)J	15969	5	5485
SUP5	15940	0	6950
tV(AAC)K2	15933	3	7113
tA(UGC)O	15656	0	5999
tN(GUU)N1	15615	10	5219
tL(CAA)G1	15614	2	7082
tV(CAC)D	15542	0	6308
tN(GUU)G	15483	1	5625
tG(GCC)P1	15338	18	6570
SUP17	15313	7	5325
tI(AAU)D	15263	5	5783
tS(AGA)D3	15257	0	5730
tI(AAU)G	15201	9	6618
tD(GUC)I1	15175	19	6090
tA(UGC)G	15056	1	4783
tN(GUU)C	14904	1	5097
tV(AAC)K1	14902	3	6583
tL(CAA)K	14877	3	7140
tV(AAC)M3	14779	2	6024
SUP51	14723	2	5184
tI(AAU)P2	14601	5	6077
tV(AAC)L	14599	6	6777
tV(AAC)E1	14594	1	6116
tL(CAA)L	14593	0	6520
tV(AAC)M1	14577	5	6649
tL(CAA)G3	14560	3	6874
tN(GUU)O1	14406	0	4845
SUP3	14405	0	5927
SUF8	14335	17	6870
tL(CAA)N	14318	13	6761
SUF9	14304	7	6279
tE(UUC)G3	14285	0	6445
tR(UCU)M1	14235	3	4361
tR(UCU)M2	14195	0	5141
tW(CCA)K	13971	0	5901
tT(AGU)O2	13886	0	4747
tI(UAU)L	13857	0	6612
tW(CCA)P	13850	0	5417
tN(GUU)P	13751	0	4497
tA(UGC)L	13689	0	5209
tV(AAC)J	13614	2	6195
tT(AGU)J	13597	1	5418
tF(GAA)P2	13586	0	5383
SUF10	13443	14	4840
tL(UAA)N	13435	5	4197
tV(AAC)G2	13435	3	6035
tR(UCU)G1	13401	1	5801
tD(GUC)J4	13395	0	6530
tR(UCU)G2	13348	1	5627
tF(GAA)P1	13257	0	4951
SUF16	13242	6	4722
SOE1	13180	22	6622
tH(GUG)E1	13161	0	5952
tP(UGG)N1	13151	2	6888
tR(UCU)E	13142	5	4798
tW(CCA)M	13112	0	5771
tE(UUC)E2	13071	12	7129
tV(AAC)G3	13011	3	6038
tV(AAC)O	12985	4	6190
tI(UAU)D	12979	1	6194
tD(GUC)K	12930	80	5424
tQ(UUG)H	12913	0	4913
TRN1	12799	7	5602
SUP56	12770	0	6353
tI(AAU)E1	12755	10	5299
IMT4	12740	0	4702
tQ(UUG)L	12648	3	4462
tV(AAC)H	12616	1	5376
tF(GAA)F	12556	0	5298
tH(GUG)E2	12513	0	6071
tA(AGC)D	12482	0	5867
tK(UUU)K	12422	0	6453
IMT1	12338	0	4776
tP(UGG)O3	12250	0	5651
EMT4	12227	0	5049
tD(GUC)M	12222	1	5231
tV(AAC)G1	12212	17	5882
tK(UUU)D	12199	1	6106
tR(UCU)K	12195	2	5189
tK(UUU)G2	12191	7330	9697
tG(GCC)J2	12174	4	5731
tW(CCA)G1	12166	0	5102
tE(UUC)E1	12097	0	6271
tK(UUU)P	12070	29	6435
tV(AAC)E2	12042	2	5499
EMT1	12031	22	5622
tW(CCA)J	11953	0	4997
tK(UUU)G1	11939	0	6146
tL(UAA)B1	11907	5	4424
tH(GUG)M	11885	15	5693
tK(UUU)O	11876	1	6256
tD(GUC)D	11871	2	6827
tD(GUC)G1	11852	1	5480
tG(GCC)P2	11824	3	5770
TRR4	11813	0	4776
tN(GUU)L	11806	0	4591
tW(CCA)G2	11796	0	4858
tF(GAA)G	11796	0	5284
tD(GUC)G2	11751	22	5601
tK(CUU)G1	11718	2	5265
tC(GCA)P1	11663	0	4929
tF(GAA)H2	11479	0	4896
tT(UGU)G2	11449	0	4382
tA(AGC)G	11379	0	4809
tL(UAA)K	11326	2	4398
tG(GCC)O1	11313	5	4562
tK(UUU)L	11293	8	5898
tE(UUC)P	11186	0	5287
tP(UGG)N2	11156	3	6009
tC(GCA)B	11147	1	4617
tK(CUU)G3	11053	13	5106
tE(CUC)D	11019	0	5262
tC(GCA)P2	11017	0	4655
tF(GAA)B	11014	0	4734
tD(GUC)J3	10963	3	6615
tG(GCC)G1	10937	8	5295
tK(CUU)F	10790	1	4158
tK(CUU)J	10755	6	4729
tH(GUG)H	10754	0	4994
tC(GCA)G	10742	0	4648
tH(GUG)K	10727	8	5179
tF(GAA)H1	10725	1	4434
tD(GUC)O	10690	1	5447
tD(GUC)J2	10642	2	6278
IMT2	10599	2	3949
tD(GUC)L1	10439	0	4517
tA(AGC)P	10439	0	4811
tD(GUC)J1	10414	0	5813
tD(GUC)B	10290	2	6196
SUF11	10232	2	4894
tK(CUU)P	10230	0	5268
EMT2	10222	3	5201
tK(CUU)I	10219	0	5056
CDC65	10180	0	4586
tA(AGC)H	10174	0	5116
EMT3	10137	0	4942
SUF7	10120	6	5131
tK(CUU)E1	10106	0	5051
SUF20	10050	2	4611
SUF1	9964	0	3655
tP(UGG)L	9927	4	5313
tK(CUU)E2	9843	1	4741
tF(GAA)D	9835	0	4193
tV(CAC)H	9831	0	4658
tN(GUU)F	9794	0	4037
SUF4	9764	0	4346
tK(CUU)K	9737	2	5260
tG(GCC)E	9715	4	5112
SUF6	9691	0	3997
SUF5	9565	32	4024
tT(UGU)G1	9402	2	4227
tP(UGG)O1	9352	9	4912
tI(AAU)L2	9289	9	4247
tG(GCC)F2	9248	70	5082
tK(CUU)G2	9186	0	4606
tD(GUC)L2	9174	0	4618
tK(CUU)D2	9123	1	4548
tK(CUU)M	9122	0	4166
tF(GAA)M	9112	0	4456
tQ(UUG)C	9102	2	3918
tA(AGC)K2	8946	1	4069
tA(AGC)J	8946	0	4526
tA(AGC)M1	8920	0	4593
tF(GAA)N	8902	1	3986
tA(AGC)K1	8896	0	4464
tA(AGC)L	8870	0	4546
IMT3	8866	0	3979
tT(UGU)P	8857	0	3926
EMT5	8807	0	4172
tE(UUC)G2	8670	0	4033
tG(GCC)G2	8575	6	4115
tG(GCC)D1	8533	4	3622
tA(AGC)M2	8509	1	4614
tG(GCC)D2	8446	2	4106
tE(UUC)K	8442	0	4582
tA(AGC)F	8307	1	3963
tE(UUC)L	7935	0	3953
SUF2	7862	1	4097
tE(UUC)I	7851	0	4338
tE(UUC)E3	7822	0	4348
tE(UUC)B	7806	0	4062
tE(UUC)J	7648	0	4040
tG(GCC)B	7439	26184	12188
tE(UUC)C	7323	0	3903
tE(UUC)M	7271	0	4187
tE(CUC)I	7271	0	3798
tQ(UUG)D3	7009	2	3101
tG(GCC)M	6810	7	3168
SUF17	6745	5	3343
tK(CUU)D1	6727	2	3624
tQ(UUG)D2	6401	9	3249
tT(UGU)H	6354	0	2987
SUP53	6118	3	3555
tQ(UUG)E1	6060	0	3276
SUF3	6052	0	2976
tG(GCC)J1	5796	4	3481
tQ(UUG)E2	5581	2	2944
tQ(UUG)D1	5150	2	2609
tK(CUU)C	4895	2	3015
tQ(UUG)B	4668	3	2602
tM(CAU)C	3400	0	1742
tD(GUC)N	3005	10	1930
## rRNA	664912	761
RDN5-1	81667	69	30484
RDN5-6	79708	424	29681
RDN5-3	75581	8	28004
RDN5-4	75407	1	27788
RDN5-2	75112	13	27929
RDN5-5	74717	5	27788
## ncRNA	49276	44
SCR1	35089	1	12238
RPR1	13925	0	6091
RNA170	133	0	91
## snRNA	16618	5
SNR6	16386	0	7088
## snoRNA	13964	371
SNR52	8399	1	4411

## Sheet: raw pyReadCounter output
Supplemental Table S1 Turowski et al.
pyReadCounter output
C160HTP_wt_glu_1
# generated by Counters version 1.2.6, Mon Aug 17 14:08:07 2015
# /usr/local/bin//pyReadCounters.py -f glu_wt_C2.novo --gtf=Saccharomyces_cerevisiae.EF4.74.shortChNames_with_PolIII_transcripts_extended_slop_intergenic_sort.gtf
# total number of reads	5752839
# total number of mapped reads:	4465117
# total number of paired reads	0
# total number of single reads	4465117
# total number of reads without overlapping features:	0
# total number of overlapping genomic features	9529972
#	sense	4933118
#	anti-sense	4596854
# feature	sense_overlap	anti-sense_overlap	number of reads
## tRNA	3770731	48183
tS(GCU)F	33689	0	10921
tS(AGA)G	32414	0	10871
tV(UAC)B	29651	0	9902
SUP61	27154	0	9434
tR(ACG)O	26537	5	7001
tI(AAU)B	26184	7439	12188
tV(UAC)D	26078	0	10060
tS(AGA)E	25540	0	7708
tS(AGA)A	25447	1	8756
tS(AGA)H	24811	0	8016
tL(GAG)G	24489	6302	11755
tL(UAG)L2	24423	0	7561
tT(AGU)I1	24395	2	7861
tR(ACG)K	23826	7	7878
tL(UAG)L1	23505	0	7198
tA(UGC)A	23488	10	8077
tS(AGA)M	23362	0	7462
tS(AGA)L	23319	0	7551
tL(UAG)J	22923	0	6817
HSX1	22893	1	6727
tI(AAU)P1	22662	4	7682
tR(ACG)D	22621	6	7340
tL(UAA)B2	22408	1	6542
tT(AGU)D	21919	1	8657
SUP19	21844	5	7440
tT(AGU)I2	21336	0	7315
SUP2	20943	0	8737
tR(UCU)D	20787	2	8847
tN(GUU)K	20598	0	6306
tS(AGA)D2	20372	3	7490
SUP16	20222	7	6273
tI(AAU)N2	20217	6	7392
tI(AAU)E2	20142	7	7433
tR(ACG)L	20123	7	7764
tS(AGA)J	19941	1	6827
tI(AAU)N1	19768	10	6714
tS(AGA)D1	19524	0	6652
tI(AAU)I2	19434	7	7447
tA(UGC)E	19409	0	7568
tN(GUU)O2	19027	0	6492
tT(AGU)H	18987	0	6934
tR(ACG)E	18755	5	6411
tR(UCU)G3	18511	2	5712
TRT2	18484	0	6954
tT(AGU)B	18467	0	6318
tT(AGU)N1	18398	0	6671
tL(CAA)M	18122	14	7276
tD(GUC)I2	18023	0	7589
tH(GUG)G2	18009	0	8532
tS(GCU)O	18004	0	8023
tS(AGA)B	17876	0	7088
tR(UCU)J2	17807	3	8506
SUP54	17583	2	7142
tS(GCU)L	17441	0	6247
tH(GUG)G1	17335	25	7087
SUP4	17309	0	6488
tR(UCU)J1	17227	2	8312
SUP8	17056	0	6191
tR(UCU)B	17048	2	8055
tT(AGU)N2	16907	0	5794
SUP7	16862	0	6986
tX(XXX)D	16858	0	6438
tL(UAA)L	16714	3	5593
tI(AAU)L1	16677	7	6087
tT(AGU)O1	16650	0	4725
tN(GUU)N2	16620	0	5871
tL(UAA)D	16600	4	5309
tT(AGU)C	16523	0	6914
tL(CAA)D	16472	0	7619
SUP11	16440	0	7014
SUP6	16365	0	6956
tV(AAC)M2	16254	1	7168
tI(AAU)I1	16104	10	5780
tR(ACG)J	15969	5	5485
SUP5	15940	0	6950
tV(AAC)K2	15933	3	7113
tA(UGC)O	15656	0	5999
tN(GUU)N1	15615	10	5219
tL(CAA)G1	15614	2	7082
tV(CAC)D	15542	0	6308
tN(GUU)G	15483	1	5625
tG(GCC)P1	15338	18	6570
SUP17	15313	7	5325
tI(AAU)D	15263	5	5783
tS(AGA)D3	15257	0	5730
tI(AAU)G	15201	9	6618
tD(GUC)I1	15175	19	6090
tA(UGC)G	15056	1	4783
tN(GUU)C	14904	1	5097
tV(AAC)K1	14902	3	6583
tL(CAA)K	14877	3	7140
tV(AAC)M3	14779	2	6024
SUP51	14723	2	5184
tI(AAU)P2	14601	5	6077
tV(AAC)L	14599	6	6777
tV(AAC)E1	14594	1	6116
tL(CAA)L	14593	0	6520
tV(AAC)M1	14577	5	6649
tL(CAA)G3	14560	3	6874
tN(GUU)O1	14406	0	4845
SUP3	14405	0	5927
SUF8	14335	17	6870
tL(CAA)N	14318	13	6761
SUF9	14304	7	6279
tE(UUC)G3	14285	0	6445
tR(UCU)M1	14235	3	4361
tR(UCU)M2	14195	0	5141
tW(CCA)K	13971	0	5901
tT(AGU)O2	13886	0	4747
tI(UAU)L	13857	0	6612
tW(CCA)P	13850	0	5417
tN(GUU)P	13751	0	4497
tA(UGC)L	13689	0	5209
tV(AAC)J	13614	2	6195
tT(AGU)J	13597	1	5418
tF(GAA)P2	13586	0	5383
SUF10	13443	14	4840
tL(UAA)N	13435	5	4197
tV(AAC)G2	13435	3	6035
tR(UCU)G1	13401	1	5801
tD(GUC)J4	13395	0	6530
tR(UCU)G2	13348	1	5627
tF(GAA)P1	13257	0	4951
SUF16	13242	6	4722
SOE1	13180	22	6622
tH(GUG)E1	13161	0	5952
tP(UGG)N1	13151	2	6888
tR(UCU)E	13142	5	4798
tW(CCA)M	13112	0	5771
tE(UUC)E2	13071	12	7129
tV(AAC)G3	13011	3	6038
tV(AAC)O	12985	4	6190
tI(UAU)D	12979	1	6194
tD(GUC)K	12930	80	5424
tQ(UUG)H	12913	0	4913
TRN1	12799	7	5602
SUP56	12770	0	6353
tI(AAU)E1	12755	10	5299
IMT4	12740	0	4702
tQ(UUG)L	12648	3	4462
tV(AAC)H	12616	1	5376
tF(GAA)F	12556	0	5298
tH(GUG)E2	12513	0	6071
tA(AGC)D	12482	0	5867
tK(UUU)K	12422	0	6453
IMT1	12338	0	4776
tP(UGG)O3	12250	0	5651
EMT4	12227	0	5049
tD(GUC)M	12222	1	5231
tV(AAC)G1	12212	17	5882
tK(UUU)D	12199	1	6106
tR(UCU)K	12195	2	5189
tK(UUU)G2	12191	7330	9697
tG(GCC)J2	12174	4	5731
tW(CCA)G1	12166	0	5102
tE(UUC)E1	12097	0	6271
tK(UUU)P	12070	29	6435
tV(AAC)E2	12042	2	5499
EMT1	12031	22	5622
tW(CCA)J	11953	0	4997
tK(UUU)G1	11939	0	6146
tL(UAA)B1	11907	5	4424
tH(GUG)M	11885	15	5693
tK(UUU)O	11876	1	6256
tD(GUC)D	11871	2	6827
tD(GUC)G1	11852	1	5480
tG(GCC)P2	11824	3	5770
TRR4	11813	0	4776
tN(GUU)L	11806	0	4591
tW(CCA)G2	11796	0	4858
tF(GAA)G	11796	0	5284
tD(GUC)G2	11751	22	5601
tK(CUU)G1	11718	2	5265
tC(GCA)P1	11663	0	4929
tF(GAA)H2	11479	0	4896
tT(UGU)G2	11449	0	4382
tA(AGC)G	11379	0	4809
tL(UAA)K	11326	2	4398
tG(GCC)O1	11313	5	4562
tK(UUU)L	11293	8	5898
tE(UUC)P	11186	0	5287
tP(UGG)N2	11156	3	6009
tC(GCA)B	11147	1	4617
tK(CUU)G3	11053	13	5106
tE(CUC)D	11019	0	5262
tC(GCA)P2	11017	0	4655
tF(GAA)B	11014	0	4734
tD(GUC)J3	10963	3	6615
tG(GCC)G1	10937	8	5295
tK(CUU)F	10790	1	4158
tK(CUU)J	10755	6	4729
tH(GUG)H	10754	0	4994
tC(GCA)G	10742	0	4648
tH(GUG)K	10727	8	5179
tF(GAA)H1	10725	1	4434
tD(GUC)O	10690	1	5447
tD(GUC)J2	10642	2	6278
IMT2	10599	2	3949
tD(GUC)L1	10439	0	4517
tA(AGC)P	10439	0	4811
tD(GUC)J1	10414	0	5813
tD(GUC)B	10290	2	6196
SUF11	10232	2	4894
tK(CUU)P	10230	0	5268
EMT2	10222	3	5201
tK(CUU)I	10219	0	5056
CDC65	10180	0	4586
tA(AGC)H	10174	0	5116
EMT3	10137	0	4942
SUF7	10120	6	5131
tK(CUU)E1	10106	0	5051
SUF20	10050	2	4611
SUF1	9964	0	3655
tP(UGG)L	9927	4	5313
tK(CUU)E2	9843	1	4741
tF(GAA)D	9835	0	4193
tV(CAC)H	9831	0	4658
tN(GUU)F	9794	0	4037
SUF4	9764	0	4346
tK(CUU)K	9737	2	5260
tG(GCC)E	9715	4	5112
SUF6	9691	0	3997
SUF5	9565	32	4024
tT(UGU)G1	9402	2	4227
tP(UGG)O1	9352	9	4912
tI(AAU)L2	9289	9	4247
tG(GCC)F2	9248	70	5082
tK(CUU)G2	9186	0	4606
tD(GUC)L2	9174	0	4618
tK(CUU)D2	9123	1	4548
tK(CUU)M	9122	0	4166
tF(GAA)M	9112	0	4456
tQ(UUG)C	9102	2	3918
tA(AGC)K2	8946	1	4069
tA(AGC)J	8946	0	4526
tA(AGC)M1	8920	0	4593
tF(GAA)N	8902	1	3986
tA(AGC)K1	8896	0	4464
tA(AGC)L	8870	0	4546
IMT3	8866	0	3979
tT(UGU)P	8857	0	3926
EMT5	8807	0	4172
tE(UUC)G2	8670	0	4033
tG(GCC)G2	8575	6	4115
tG(GCC)D1	8533	4	3622
tA(AGC)M2	8509	1	4614
tG(GCC)D2	8446	2	4106
tE(UUC)K	8442	0	4582
tA(AGC)F	8307	1	3963
tE(UUC)L	7935	0	3953
SUF2	7862	1	4097
tE(UUC)I	7851	0	4338
tE(UUC)E3	7822	0	4348
tE(UUC)B	7806	0	4062
tE(UUC)J	7648	0	4040
tG(GCC)B	7439	26184	12188
tE(UUC)C	7323	0	3903
tE(UUC)M	7271	0	4187
tE(CUC)I	7271	0	3798
tQ(UUG)D3	7009	2	3101
tG(GCC)M	6810	7	3168
SUF17	6745	5	3343
tK(CUU)D1	6727	2	3624
tQ(UUG)D2	6401	9	3249
tT(UGU)H	6354	0	2987
SUP53	6118	3	3555
tQ(UUG)E1	6060	0	3276
SUF3	6052	0	2976
tG(GCC)J1	5796	4	3481
tQ(UUG)E2	5581	2	2944
tQ(UUG)D1	5150	2	2609
tK(CUU)C	4895	2	3015
tQ(UUG)B	4668	3	2602
tM(CAU)C	3400	0	1742
tD(GUC)N	3005	10	1930
tV(UAC)Q	10	0	8
tE(UUC)Q	6	3	7
tF(GAA)Q	6	0	5
tW(UCA)Q	5	0	5
tT(UGU)Q1	4	0	4
tC(GCA)Q	4	0	4
tH(GUG)Q	1	0	1
tI(GAU)Q	1	0	1
tA(UGC)Q	1	0	1
tY(GUA)Q	1	0	1
tD(GUC)Q	1	0	1
tQ(UUG)Q	0	3	1
tL(UAA)Q	0	3	1
## rRNA	664912	761
RDN5-1	81667	69	30484
RDN5-6	79708	424	29681
RDN5-3	75581	8	28004
RDN5-4	75407	1	27788
RDN5-2	75112	13	27929
RDN5-5	74717	5	27788
RDN37-1	51258	60	24104
RDN37-2	50755	68	23887
RDN25-1	27367	22	12028
RDN25-2	27113	16	11862
RDN18-1	20763	9	10222
RDN18-2	20603	27	10203
RDN58-1	2166	16	1355
RDN58-2	2149	13	1329
21S_RRNA	344	10	222
15S_RRNA	202	0	141
## protein_coding	137788	410472
MTC7	16041	0	3908
YNL042W-B	11234	2	6328
YDR278C	10999	0	5250
YDR445C	9123	1	4548
YPR108W-A	8399	0	3652
YOL013W-A	8357	9	4363
YOR072W-B	7193	2	4170
YHR145C	6257	3	2316
YHR180W-A	6115	0	2837
YER097W	2955	0	1608
YLR154C-G	1550	0	913
CIS1	940	1	582
EST3	799	0	434
RAD7	435	2	272
FBA1	342	1	230
PMA1	285	23	173
PDC1	275	3	170
TDH3	269	0	190
YLR143W	253	0	152
TEF1	245	10	163
TEF2	236	3	158
YEF3	216	2	157
CCW12	214	0	126
HAC1	212	0	156
CDC19	207	0	153
MSS1	199	22	136
SLO1	194	0	129
FAS1	187	1	121
COX1	186	12	133
RPL10	177	3	120
LAG2	172	4	96
ASC1	162	2	96
IBD2	159	0	16
ADH1	154	0	90
RPS7A	154	3	114
YDR506C	154	0	90
YVC1	148	0	71
RPL2A	141	0	109
RPL40B	138	0	87
THS1	137	2	62
EFB1	137	0	79
RPS0B	134	0	82
YNL035C	133	0	63
ALD6	132	0	79
AI5_ALPHA	132	8	97
RPS1B	130	0	91
AI4	124	8	94
AI3	123	8	93
AI2	123	6	91
ENO2	122	0	98
RPL7B	122	2	63
ARO1	116	6	69
SSA2	115	0	87
RPS2	113	0	67
RPS15	112	0	79
RPL17A	112	2	79
RPL3	109	0	75
RPS12	103	0	62
VPS29	102	1	68
TPI1	102	0	64
FKS1	102	3	71
RPL21A	100	0	65
OYE2	100	1	66
RPL2B	99	1	59
BUD31	99	10	73
APS3	98	1	55
TRP5	98	0	71
RPL15A	94	0	78
RPL28	94	1	82
ACC1	94	4	63
YFL032W	92	0	60
RPL20B	92	0	55
RPL7A	92	0	59
ADE6	92	1	41
RPS4A	91	0	72
MIP6	91	1	44
RPS5	90	0	67
GPM1	90	4	75
TRA1	90	10	72
YDR365W-B	90	3	91
TEF4	90	0	57
PGK1	90	0	62
AI1	89	2	66
SSA1	87	0	56
CPR1	85	0	62
YER138C	85	3	83
DSE4	84	1	53
YGR027W-B	84	1	76
YBR126W-B	84	0	52
YBR126W-A	84	0	52
YLR227W-B	84	2	82
YML039W	83	1	80
YML045W	83	2	78
YLR157C-B	82	0	79
DCD1	82	1	40
YMR013W-A	82	0	54
RPS6A	82	0	59
HSC82	81	8	57
BEM2	81	8	58
SAH1	81	2	54
YPR158C-D	81	2	80
YPR158W-B	81	2	76
RPS30B	81	0	47
YPR137C-B	80	4	80
YDR261C-D	80	2	80
YPL257W-B	80	2	80
URA2	80	0	45
RPL27A	80	0	55
RNR1	79	0	53
RPL12B	79	0	59
RPS11B	77	0	53
YFR035C	77	1	38
RPO21	76	2	56
YDR524C-B	76	0	52
ACT1	76	4	61
SVP26	76	0	47
YJR027W	76	2	77
CTS1	75	3	60
RPS21B	75	0	60
SRO77	75	1	12
YOR142W-B	72	4	65
RPL18A	72	0	48
YGR161C-D	72	0	65
PHO88	72	0	49
RPS26A	71	0	48
YOL103W-B	71	1	70
YDR316W-B	70	2	69
STM1	70	0	44
YDR089W	70	4	59
RPS9B	70	1	38
TMA19	70	0	41
YGR038C-B	69	5	73
RPS3	69	0	39
YDR210C-D	69	4	69
TEN1	68	0	39
RPL36B	68	3	44
YHB1	68	0	28
RAD3	68	0	4
RPL9A	68	0	39
HYP2	67	0	44
VPS13	67	4	41
DYN1	67	8	48
SSB1	67	0	48
AIM29	66	0	36
RPL30	66	0	44
YJR029W	65	1	64
KRS1	63	0	47
RPL19B	63	1	48
RPS22A	63	0	47
RPS20	63	0	33
CDC20	63	3	33
YSP2	63	0	26
YDR098C-B	63	1	61
YMR050C	63	5	64
RPS24B	63	2	47
TSA1	62	0	44
SNF2	62	1	31
ILV1	62	1	42
YBL005W-B	62	4	58
SNT1	62	4	53
HSP150	61	0	38
PFK1	60	1	42
RPS14B	60	3	40
RPL12A	60	21	63
YHR214C-B	59	1	58
CWP2	59	0	39
COG8	59	1	47
STT4	59	19	41
RPS6B	59	0	45
BAP2	58	0	40
YLR063W	58	1	6
YKU70	58	1	22
EMP47	58	0	20
ARB1	58	2	40
RPA190	57	3	31
RPL26B	57	0	43
RPS7B	57	1	34
ACO1	56	0	31
RPS31	56	0	44
VAS1	56	0	40
YNL010W	56	0	22
TYW3	56	0	24
SPT7	55	28	55
RPL5	55	0	39
YOL019W-A	55	0	39
KGD1	55	1	30
HER1	55	2	21
UTH1	55	0	41
RPL39	54	0	46
PRE6	54	0	40
EGT2	53	0	25
OAC1	53	1	28
GDS1	53	0	17
ERG3	52	0	31
SEM1	52	0	18
HIT1	52	0	31
RPS8B	52	0	47
COB	52	11	50
YMR259C	52	1	41
EHT1	52	0	38
ZEO1	52	0	47
YBR012W-B	51	0	45
VRG4	51	0	29
IMD4	51	1	43
GUA1	51	1	29
THR4	50	0	29
YAR009C	50	1	48
YOP1	50	3	32
PGI1	50	1	42
RAV2	49	1	6
GGC1	49	0	33
TOS1	49	0	30
RPL25	49	1	27
VPH1	49	1	32
NUP2	49	3	47
RPL37A	49	0	32
YPT10	49	0	24
PSA1	49	0	37
NSR1	48	0	37
YGL088W	48	0	30
YDR282C	48	0	25
SSC1	48	2	35
YNR029C	48	0	4
YER160C	48	0	46
TMA108	48	4	26
UBX7	48	8	33
TRK1	48	0	27
SRO9	48	0	39
ECM29	47	1	32
AHP1	47	0	23
DSE2	47	1	23
RHR2	47	0	36
LSG1	47	2	9
GSH2	47	1	33
ATP4	47	0	37
RPL16A	47	3	35
BUD2	47	2	23
GPX2	47	0	29
DUR1,2	47	4	11
HXK1	46	0	41
RPS14A	46	1	32
SMC1	46	2	33
RPL23B	46	1	37
HTB1	46	0	33
HSP60	46	0	33
BUD4	46	0	15
TUB2	46	0	26
DPH1	45	1	25
RPL19A	45	0	22
RPL4B	45	0	25
LAA1	44	1	25
RPL14A	44	0	35
RPS18A	44	1	36
BDF2	44	0	26
CLB5	44	3	5
ADE13	44	1	26
ATP2	44	4	26
PDS5	44	1	22
RPS11A	44	0	23
CHS1	44	4	26
YMR045C	44	11	42
ERG6	43	0	34
SLA2	43	1	18
MEX67	43	7	25
RPS8A	43	1	34
NOG1	43	1	16
MDS3	43	2	33
ASN1	43	12	35
LEU1	43	0	34
YCK2	43	1	31
MOT1	43	2	32
RUP1	42	1	29
YNL284C-B	42	18	51
HSP104	42	0	20
RPL4A	42	0	27
POR1	42	0	27
MLP1	42	2	22
AAP1	41	11	36
YIL002W-A	41	0	15
RPL31B	41	5	35
DOP1	41	9	33
RPS21A	41	0	26
RRP12	41	1	30
BUD3	41	1	18
DUG1	41	0	23
RPL29	40	0	27
RPL31A	40	1	22
ACO2	40	7	35
HHT1	40	0	26
PEP4	40	6	9
YBR287W	40	10	35
EMP70	40	3	38
RPL24A	40	1	21
SCEI	40	1	30
PHO91	40	1	26
NUM1	40	5	25
CDC48	39	1	29
RPN3	39	0	20
GPB2	39	1	21
YDR154C	39	0	32
SWI5	39	15	20
NOG2	39	1	18
TEL1	39	4	35
YHR162W	39	0	22
RPL22A	39	0	15
ELA1	39	0	24
MMP1	39	1	25
AMN1	39	0	20
RPS13	39	0	26
LEU4	39	2	27
SAM3	39	0	25
IDP1	39	1	32
YCR023C	39	0	9
ARC35	38	1	22
CDC33	38	0	25
EFT1	38	0	28
CMD1	38	0	18
CLU1	38	0	29
SSB2	38	0	28
MTM1	38	0	19
SSE1	38	0	22
YOR059C	38	98	89
YLR279W	38	0	20
AVL9	38	0	31
RPL14B	38	0	31
KEX1	38	0	21
BCY1	37	0	29
RBA50	37	0	26
PHO8	37	2	26
SGO1	37	0	13
YSH1	37	28	17
RPL20A	37	1	26
UBA2	37	1	17
SGV1	37	0	17
ALY2	37	2	21
HIS1	37	0	24
PUN1	37	0	30
SUP45	37	0	25
MLP2	37	8	37
NOP14	37	1	16
ATP22	37	4	12
EMP24	36	3	28
MSB1	36	1	20
MDN1	36	25	37
YOL036W	36	0	26
HYR1	36	0	21
GGA2	36	0	22
RKR1	36	4	28
ATG10	36	1	26
APL5	36	0	21
KRE5	36	12	26
TDH2	36	1	32
NAB6	36	3	34
CHC1	36	2	29
GSP1	36	0	24
NOP2	35	1	21
POL30	35	0	17
SSF1	35	0	15
ENO1	35	0	29
SHQ1	35	0	24
RPL18B	35	0	29
RPL21B	35	0	25
YCF1	35	1	22
KGD2	35	0	13
ILV3	35	0	22
HHT2	35	0	20
HIS4	35	38	45
RPO41	35	2	24
MRI1	35	46	25
HXT1	35	0	18
RPP1B	35	0	31
PRY1	35	0	20
RRN5	35	15	31
SKM1	35	0	30
HST1	35	1	22
YLR001C	35	0	25
AGP1	35	1	24
GSC2	34	4	27
YCH1	34	0	15
ARG2	34	2	23
AFG3	34	1	19
YJR003C	34	0	16
BAG7	34	4	26
TCB3	34	1	29
SBH2	34	0	18
NDE1	34	0	19
SIM1	34	0	24
SUI3	34	0	24
TOF2	34	26	30
GRH1	34	0	16
POL1	34	10	37
PHO84	34	0	21
SLT2	34	0	27
RPL13B	34	1	27
YHR069C-A	34	0	13
YDL073W	33	4	24
RPL33A	33	0	23
LCB4	33	1	27
COX19	33	0	9
TOR2	33	1	7
ADH3	33	24	28
ADH6	33	0	24
SUP35	33	0	23
RPL38	33	0	29
ABP1	33	0	18
EFT2	33	1	21
MEU1	33	33	42
HOR7	33	0	17
HRD3	33	1	21
PSY2	33	0	18
MCM6	33	1	21
RPL35A	33	1	26
VCX1	33	67	28
ESS1	33	0	12
STB2	33	0	22
GIM4	33	0	21
SLU7	33	0	15
YLR345W	33	2	20
GCR1	33	4	5
GID7	33	0	26
RUD3	33	1	18
PIB2	33	0	16
SIF2	32	0	4
MTR10	32	1	31
MSC3	32	2	19
GID8	32	23	24
NUP57	32	0	20
RPL34B	32	0	21
GLC7	32	5	28
HOT13	32	0	15
PMD1	32	1	23
QDR3	32	1	21
AGE2	32	0	16
PCL6	32	0	15
CKB1	32	0	19
CEX1	32	15	38
FET3	32	1	26
FLC1	32	0	12
SCC4	32	0	17
DIF1	32	0	23
VMA2	32	0	21
YFR016C	32	0	18
YPL039W	31	0	18
VAC14	31	2	26
GCD10	31	4	28
DAK1	31	0	25
RPA49	31	0	22
BET5	31	0	3
PIS1	31	0	22
TAH18	31	2	23
PRP39	31	1	16
HSL1	31	2	14
RPL37B	31	2	23
PRP16	31	3	16
SEC53	31	1	19
VTC1	31	0	17
ATG18	31	0	18
FMP25	31	1	20
VPS4	31	1	24
HOF1	31	2	15
ATP1	31	4	20
EBP2	31	0	19
MAK5	31	2	21
MDM20	31	0	23
RIX7	31	4	28
THI22	31	0	21
YBR056W-A	31	0	16
RPS0A	31	0	22
FTR1	31	0	13
YBR197C	31	0	4
RFC3	31	16	30
SYH1	31	0	15
PCH2	31	1	13
PKC1	30	2	20
CTF18	30	2	25
ARE2	30	1	22
GCV3	30	0	21
UBR1	30	9	20
BRE5	30	3	24
MET6	30	4	20
SUR4	30	0	15
SMC6	30	1	19
YEL020C	30	0	17
PUF2	30	1	23
PCL5	30	0	17
SAR1	30	19	17
SAM4	30	0	26
NUP145	30	0	12
STI1	30	0	21
RPS22B	30	0	23
DIP2	30	0	26
TAN1	30	1	20
PUS7	30	0	21
NUP188	30	2	19
ZRC1	30	1	17
SSU1	30	0	16
PHO81	30	0	15
YLR419W	30	0	26
SNT2	30	4	19
YJR084W	29	0	22
RPN5	29	0	21
RPN8	29	0	18
CCP1	29	1	26
YBR056W	29	1	19
PHO2	29	2	13
YNL162W-A	29	0	21
MSG5	29	0	14
SDH1	29	2	18
SCW11	29	0	12
KAE1	29	0	18
FCF2	29	0	13
NVJ1	29	1	15
SOD1	29	0	20
OPY1	29	1	18
NGL1	29	0	19
GAS1	29	0	23
NUP1	29	1	23
RFS1	29	0	20
DPS1	29	0	27
ATH1	29	0	18
DSK2	29	27	41
TDA4	29	0	14
RPS25A	29	0	24
GIC2	29	0	23
RRG8	29	3	21
UTP8	29	0	22
PDI1	28	1	21
KAP122	28	1	15
RKI1	28	0	21
TPS2	28	0	19
NOP4	28	2	15
HXK2	28	0	18
AMS1	28	4	17
YML053C	28	0	11
YBL005W-A	28	4	24
YMC2	28	0	19
PGA2	28	0	24
TIM10	28	0	15
SPO14	28	1	22
PPQ1	28	1	21
RPL32	28	0	14
SHS1	28	2	22
RPS17B	28	0	20
PEX27	28	4	25
RTG2	28	3	28
SSM4	28	3	21
CWC23	28	20	15
REB1	28	6	22
RPT1	28	1	20
THI7	28	12	19
KCS1	28	3	27
MCH1	28	0	15
RRB1	28	2	25
YJL047C-A	28	3	18
TIF35	28	0	17
YNL181W	28	3	16
PPX1	28	0	18
YDL199C	28	0	21
SES1	28	1	19
ISU1	28	0	16
CAF16	28	53	36
AAT2	28	0	19
RRT13	28	0	15
VMA9	28	0	15
NET1	28	5	19
AQR1	28	4	17
TAT1	28	1	18
YNL194C	28	1	20
PDR12	27	3	15
MSS51	27	1	18
TOP2	27	2	25
GLN1	27	0	22
MSN5	27	1	15
LAP4	27	0	21
CSM1	27	0	15
RPP0	27	0	21
PHO13	27	0	16
DIS3	27	21	33
MEC1	27	4	25
ADE8	27	0	22
QCR9	27	0	13
AIM45	27	0	22
BDF1	27	12	22
DED1	27	30	27
SRP72	27	1	18
MHP1	27	0	23
HNM1	27	1	18
SED1	27	0	15
FOL2	27	1	18
RPS10A	27	0	19
SCW4	27	0	23
HIS6	27	0	15
REV1	27	2	13
SOK1	27	4	21
IPP1	27	5	11
OLI1	27	0	16
FRQ1	27	1	23
FMT1	27	0	16
TIM23	27	0	21
ETT1	27	0	21
STE23	27	0	15
CST9	27	0	2
CEF1	27	0	14
FUS3	27	0	11
VMA3	27	0	21
PPH22	27	0	14
SYP1	26	2	11
RPT6	26	3	23
TKL1	26	1	24
ZRT1	26	0	21
ECM22	26	1	18
YLR157C-A	26	0	26
ADE1	26	0	12
ECM14	26	4	25
WHI4	26	8	22
ZWF1	26	1	17
MAK21	26	1	17
STE6	26	1	19
AUS1	26	21	15
SNU13	26	0	13
RPG1	26	1	17
BOI2	26	20	20
YLR046C	26	0	23
CLN2	26	1	20
LPX1	26	1	20
YRA1	26	10	20
POL31	26	0	6
CCT5	26	0	23
CDC6	26	1	12
RPS30A	26	0	21
BI4	26	1	24
SPT23	26	19	22
SLK19	26	0	21
SSS1	26	0	17
APE3	26	4	23
LAS21	26	2	13
TOM40	26	1	24
BAT1	26	0	21
ECL1	25	1	19
THR1	25	0	13
PDR16	25	3	20
ERG25	25	3	19
HO	25	0	15
YJR015W	25	0	19
RSM18	25	0	20
DPP1	25	0	16
MCM3	25	0	14
RPL43A	25	1	25
PNS1	25	4	22
MVD1	25	0	19
YOR192C-B	25	6	26
ARO3	25	0	19
ZUO1	25	0	19
OPI1	25	6	17
GCN3	25	0	20
RPA14	25	0	12
UPC2	25	1	16
YDR262W	25	3	19
YOR343W-B	25	0	25
YTM1	25	0	21
HEH2	25	1	4
CFT1	25	4	19
COG2	25	0	2
OTU2	25	0	14
YDR365W-A	25	3	27
RPS27B	25	0	19
ADE5,7	25	0	5
YLR126C	25	0	19
SRC1	25	12	28
MAS2	25	1	22
TDA11	25	0	20
CCR4	25	0	17
VMA8	25	0	15
YDR316W-A	24	0	23
DLD2	24	1	15
CTF19	24	0	21
DSF2	24	1	18
ECM32	24	0	15
DTR1	24	3	15
EGD1	24	0	19
THP1	24	0	13
SYS1	24	0	14
TRM112	24	0	13
YPL257W-A	24	0	24
CAR2	24	1	16
VTC2	24	1	20
SNA3	24	16	23
REC114	24	0	12
CHO2	24	1	17
SLX4	24	0	16
GCN4	24	55	60
NHX1	24	28	21
RPS10B	24	0	15
YDL027C	24	2	22
PEX1	24	3	4
CIS3	24	0	20
ARP9	24	1	18
RAD2	24	0	14
RDL1	24	1	15
FAR11	24	1	14
YER137C-A	24	2	25
HSP82	24	8	14
FLO5	24	3	25
KTR6	24	0	17
FAS2	24	1	16
RPL17B	24	0	20
KIN2	24	1	19
SHR3	23	0	20
AIM37	23	0	19
YDR261W-B	23	5	26
STE24	23	0	21
YLR179C	23	0	1
ECM30	23	0	12
GAS5	23	19	27
BGL2	23	6	21
OST1	23	0	20
AIM43	23	0	18
TUB3	23	0	5
GTB1	23	3	21
GEP3	23	2	13
YLR256W-A	23	0	21
SOD2	23	0	20
ALY1	23	0	14
KEL2	23	0	4
MRPL49	23	0	15
YMR135W-A	23	0	3
SAK1	23	0	12
XRN1	23	1	11
CCT8	23	0	16
PIL1	23	0	20
YJR026W	23	2	24
ARG81	23	0	18
COX3	23	0	19
TAZ1	23	0	18
KAR2	23	0	6
MBF1	22	0	4
SOM1	22	0	10
YDL063C	22	0	21
YBT1	22	1	21
RPC40	22	5	18
PTH2	22	1	15
YOR142W-A	22	3	23
ECM21	22	0	20
CIR1	22	2	19
VMR1	22	0	17
SPE3	22	0	18
UBC4	22	0	14
RPL16B	22	0	15
PSH1	22	0	14
ECM5	22	0	16
ISU2	22	0	16
HAL9	22	5	18
SHM2	22	0	17
ATG17	22	0	15
FUN12	22	0	22
YKL077W	22	0	19
YGR027W-A	22	1	21
SXM1	22	1	14
CBF2	22	0	17
CSF1	22	23	30
SNU23	22	0	14
OPT1	22	1	14
YJR107W	22	0	8
CDC3	22	0	16
HOM3	22	2	17
YFR039C	22	0	12
RGD1	22	0	11
ERV29	22	1	15
MDM1	22	4	23
YOR342C	22	0	14
SEC9	22	0	19
RRP42	22	0	14
PRS3	22	0	8
PRP8	21	13	25
SSP1	21	1	16
BUD21	21	3	16
SPC42	21	1	19
MSL1	21	0	7
VPS34	21	1	14
PFY1	21	0	15
EDE1	21	1	19
TYS1	21	0	15
RPS16B	21	0	8
SUR7	21	1	12
HOG1	21	3	12
TIP20	21	0	16
NOP10	21	0	18
LIA1	21	2	14
PGM1	21	1	14
YLR035C-A	21	1	21
SCS7	21	0	15
RPS1A	21	1	13
RPT3	21	18	26
ATP6	21	0	11
CLA4	21	0	16
YME1	21	1	14
FMP23	21	0	10
SPH1	21	2	17
MRH1	21	0	17
LPD1	21	19	22
YGR161C-C	21	0	20
CNL1	21	1	15
RPL26A	21	0	19
KTR5	21	1	16
MGS1	21	2	12
SEC24	21	1	13
SFI1	21	3	5
VPS36	21	1	15
MRN1	21	1	16
YDR098C-A	21	0	20
RBK1	21	0	10
ELF1	21	0	17
YJR028W	20	1	19
BEM3	20	0	13
GLT1	20	4	17
UTP10	20	5	22
ROK1	20	0	12
CDC60	20	0	12
PRP22	20	3	6
YBR012W-A	20	0	16
YDL057W	20	0	15
YML045W-A	20	1	21
RPL42A	20	1	18
YDR261C-C	20	1	21
GSY2	20	6	18
TCO89	20	0	16
SRV2	20	1	12
RRP7	20	0	16
HIS5	20	1	11
YML040W	20	0	19
ROT2	20	3	20
HHF2	20	1	17
RNR4	20	0	16
EXG2	20	0	2
SWR1	20	4	19
RRN6	20	1	6
CUR1	20	0	10
PXA1	20	2	10
SEC5	20	22	12
YMR051C	20	4	22
ERV1	20	0	19
YML133C	20	0	11
YPL191C	19	0	3
FAR3	19	0	16
SNF12	19	2	4
ECM33	19	0	16
EIS1	19	0	15
YGR038C-A	19	2	21
RPS4B	19	0	18
ACN9	19	0	9
AIM13	19	0	1
BAP3	19	0	15
RPA135	19	6	19
YLR227W-A	19	1	19
STE11	19	14	23
YHR214C-C	19	0	18
SUV3	19	2	9
NTE1	19	6	19
NUP170	19	3	5
HMS2	19	1	13
WHI2	19	7	18
IRS4	19	0	12
YFL002W-A	19	0	19
TIM44	19	0	17
CDC15	19	3	19
YLR410W-B	19	4	18
POC4	19	15	22
RPL35B	19	0	15
CAB1	19	1	19
RPF2	19	0	3
YPL222C-A	19	0	10
RPL23A	19	0	16
RPL34A	19	12	19
BMH1	19	0	14
DOS2	19	0	15
YBL059W	19	0	14
RFA1	19	3	10
YGR161W-B	19	1	17
SRP14	19	0	13
RPE1	19	0	16
BUD9	19	0	14
RTN2	19	0	1
APC4	19	13	3
MPP6	19	0	13
IRE1	19	0	17
YOL103W-A	19	0	19
ARG4	19	0	17
YOR203W	18	0	10
NSE1	18	0	6
VHS2	18	0	15
ERG11	18	0	11
FLC2	18	0	9
MRPL28	18	0	17
YDL176W	18	1	15
DEF1	18	1	14
CIC1	18	1	18
ASK1	18	0	12
FAB1	18	24	23
RPS16A	18	0	13
SLA1	18	3	17
SWH1	18	2	12
PPR1	18	1	12
YGR269W	18	0	15
COP1	18	1	13
YIL177C	18	7	13
PAN1	18	3	19
DDR48	18	0	16
NCB2	18	0	10
NMD5	18	0	14
SLZ1	18	2	4
RSN1	18	6	4
YMD8	18	1	12
RIB5	18	0	15
LOC1	18	0	14
GPI16	18	0	14
TID3	18	11	7
YBR235W	18	1	13
MSH2	18	0	12
UBP12	18	2	16
RSC58	18	1	7
RPP1A	18	0	12
UTP22	18	5	16
AFR1	18	2	11
FIG2	18	2	18
PHO80	18	0	14
YMR046C	18	11	18
VMA6	18	0	15
KAR9	18	23	23
MSS4	17	0	6
RPS29A	17	0	4
LCB1	17	10	12
BNI1	17	8	15
PIG1	17	0	7
HHF1	17	0	16
SLN1	17	0	15
CNM67	17	0	7
APM1	17	0	13
RPC82	17	0	1
YOR262W	17	0	2
RDH54	17	3	14
RPL42B	17	0	13
ACS2	17	0	13
RTT106	17	4	15
RPT4	17	0	12
GIS3	17	0	10
QDR1	17	1	6
QDR2	17	0	4
SKN1	17	0	15
RPL24B	17	0	7
CSG2	17	0	12
YGR001C	17	0	7
IWR1	17	5	11
GAS3	17	1	7
PEX6	17	0	13
YCL019W	17	2	17
SIT4	17	0	7
PRC1	17	1	14
HKR1	17	0	15
UGA2	17	0	10
GVP36	17	0	15
NAM9	17	4	15
CYK3	17	1	4
AAR2	17	0	14
RPS24A	17	1	16
SIP3	16	5	16
YNL208W	16	0	14
LYS20	16	0	6
DNF1	16	2	8
SMC5	16	1	10
PEX25	16	0	7
RSC1	16	1	15
SGF73	16	0	8
UBP3	16	35	33
SGM1	16	0	2
PMT2	16	0	14
MTG2	16	0	2
TSR1	16	1	14
FIR1	16	1	4
TIM50	16	1	13
FOL3	16	1	12
YBL100W-B	16	3	17
TSL1	16	1	4
YPR158W-A	16	1	16
RPL40A	16	4	17
YNL247W	16	2	5
CCL1	16	1	15
GPI11	16	0	2
RIM21	16	0	10
TIF34	16	0	4
HPR1	16	11	8
YJL225C	16	2	9
CSE2	16	0	13
UBP16	16	1	13
NIC96	16	2	3
YHK8	16	20	25
MOT3	16	0	16
KEX2	16	1	12
YLR154W-E	16	2174	1359
YMR018W	15	1	2
ARG1	15	0	8
MCT1	15	1	15
MAP1	15	0	12
ATG9	15	4	14
DNF2	15	3	7
CTH1	15	0	10
YBL086C	15	0	15
SET1	15	1	4
WTM1	15	3	12
MMF1	15	0	6
YDR210W-B	15	0	14
YPR150W	15	0	10
YPL260W	15	0	9
RCK2	15	1	15
PAN5	15	0	3
YTA6	15	1	7
YPR076W	15	0	4
MAK16	15	0	9
RPS23A	15	0	9
MUK1	15	0	11
TPK3	15	0	10
YJL181W	15	6	11
ILV5	15	0	8
VAM6	15	0	3
LAG1	15	0	14
ENB1	15	2	6
ELP6	15	0	11
RSP5	15	1	14
YRF1-1	15	2	9
YRF1-7	15	3	9
YPR158C-C	15	1	16
YMR173W-A	15	0	14
TIM13	15	0	14
MYO1	15	1	8
MYO4	15	1	15
YRF1-6	15	0	7
ADE2	15	0	13
RPS26B	15	3	15
CRN1	15	1	14
SEC26	15	3	10
ASN2	15	19	6
SRL1	15	1	14
ARG82	15	0	10
BDP1	15	1	15
YOX1	15	0	13
YIL141W	15	0	1
BCH1	15	1	13
IMD2	15	0	8
SEN1	14	7	12
GLN3	14	2	16
BYE1	14	0	1
TPO2	14	0	3
EPS1	14	1	2
RRP9	14	3	5
ICP55	14	3	14
HIR1	14	1	2
MNS1	14	24	13
YEL023C	14	2	4
NMD2	14	0	12
BSC5	14	0	4
RPS23B	14	0	8
PCA1	14	1	2
DAL81	14	1	4
RPF1	14	0	5
RPT2	14	0	6
YAR010C	14	2	14
RIB3	14	1	14
PTM1	14	1	9
PMC1	14	0	11
YDR210C-C	14	1	13
TIF2	14	0	11
RTC5	14	1	8
YJR030C	14	2	9
DBP2	14	4	13
YKR005C	14	6	7
YRF1-5	14	1	7
HIS7	14	0	13
CRH1	14	3	12
YGL140C	14	1	13
YDR034C-D	14	2	15
DBF4	14	0	11
RPL27B	14	4	15
TAT2	14	0	13
ARC15	14	0	14
MET12	14	1	9
VMA1	14	5	16
SNU71	14	0	3
RPB11	14	0	7
KAR1	14	8	8
RPO26	13	0	6
RPN9	13	0	9
YIL134C-A	13	0	4
TOS3	13	0	9
MTC5	13	1	5
CIA1	13	0	6
RPS29B	13	0	9
SKG3	13	3	9
BTN2	13	3	13
SET4	13	0	3
SCP160	13	3	10
MPH2	13	0	4
HEM2	13	0	10
SCD5	13	1	8
MDM30	13	1	12
ASF2	13	1	3
YIL100W	13	3	11
RCL1	13	0	10
VPS33	13	0	12
IFA38	13	0	10
YER159C-A	13	0	11
SLY1	13	35	19
RPS18B	13	0	9
TIF1	13	0	13
REC107	13	0	2
GPH1	13	0	4
YMR295C	13	2	14
YER188W	13	1	6
YIP1	13	0	2
LHP1	13	0	3
SER1	13	1	13
CBP1	13	0	3
YDL086W	13	0	8
DBF20	13	0	8
ALG6	13	0	2
ARC18	13	0	13
DEP1	13	0	10
RED1	13	0	3
RVB1	13	1	4
YNL054W-A	12	9	19
SIW14	12	0	3
UBP8	12	1	10
NAP1	12	0	4
YDR109C	12	0	1
YLR399W-A	12	0	8
ECM3	12	0	12
SNQ2	12	4	10
RHO2	12	0	12
VPS68	12	0	12
SOL3	12	0	11
YPR089W	12	2	13
RPB8	12	0	9
SPP41	12	4	6
MTR4	12	0	12
PDC2	12	1	2
RTT101	12	0	12
EPL1	12	1	12
GOR1	12	1	10
PRS5	12	0	9
NOP56	12	0	10
YRF1-3	12	1	8
FAA4	12	0	9
YMR320W	12	0	3
TIF4632	12	2	9
PIM1	12	20	17
ROX1	12	0	3
BCK1	12	1	10
HXT3	12	0	3
STB4	12	2	3
HOS2	12	1	10
RTN1	12	0	12
MYO2	12	2	8
PKP2	12	0	5
RRP3	12	16	18
YNL097W-A	12	0	2
LYS2	12	4	8
LSM6	12	0	12
YJU3	12	0	7
LAT1	12	0	10
PAU17	12	0	3
KAR4	12	5	9
PDR15	11	2	4
STE14	11	0	6
SRP1	11	0	7
FYV5	11	0	6
MET3	11	0	10
AIM46	11	0	7
KIN82	11	0	5
ADH2	11	0	2
TDH1	11	0	8
PDR5	11	4	14
UBC1	11	0	8
RDS3	11	7	11
YTA12	11	0	9
RPL15B	11	0	10
IMD3	11	0	7
YFL064C	11	0	2
PDR8	11	0	5
MRD1	11	2	12
CAF20	11	0	8
MRC1	11	2	6
MET30	11	2	7
YOL098C	11	2	12
TAF11	11	2	9
LYS4	11	2	11
SEC7	11	1	11
TDP1	11	1	3
CPA2	11	5	9
YDR261W-A	10	4	13
VBA4	10	0	6
TAE2	10	4	14
MDR1	10	3	6
YLR140W	10	5	11
UTP15	10	0	2
PEX19	10	1	2
GCD6	10	0	7
TMA17	10	0	5
EMI2	10	0	3
YLR120W-A	10	0	8
TOM22	10	0	1
PEX8	10	0	4
ADK1	10	0	5
NEO1	10	0	9
SPF1	10	6	9
UBP5	10	0	6
VPS53	10	6	10
TGL5	10	20	16
MIR1	10	0	3
TAO3	10	6	11
YPR202W	10	0	1
ARO8	10	3	13
YNR068C	10	0	1
GON7	10	0	3
PMP2	10	0	8
ARP3	10	1	6
YCR064C	10	629	379
TAF10	10	0	6
YAP3	10	1	3
YPR137C-A	10	2	12
YDR307W	10	0	10
YER152C	10	0	7
YAL031W-A	10	0	6
YPR117W	10	1	9
TPO4	9	0	6
YNL067W-A	9	0	6
FCP1	9	24	7
ZRG17	9	0	7
PSR1	9	1	5
HBT1	9	0	3
LYS21	9	0	2
LEM3	9	0	8
YBL111C	9	0	7
PAR32	9	0	4
RPL1B	9	0	8
MTD1	9	0	3
BNA4	9	1	2
RAD30	9	4	6
SED4	9	2	5
NIT3	9	0	6
GRX8	9	13	10
YNR061C	9	0	2
YRF1-8	9	1	7
CDC39	9	3	11
ALK1	9	0	4
RPL8A	9	0	6
MRS3	9	0	8
TFC3	9	2	5
VPS15	9	0	6
MID2	9	1	3
YBR255C-A	9	0	7
INN1	9	0	3
RGD2	9	27	7
IML1	9	4	13
VNX1	9	1	3
BDS1	9	1	3
TDA9	9	0	7
VHT1	9	1	4
YLR161W	9	0	8
ERG1	8	0	4
BIR1	8	2	6
MUS81	8	0	7
STP1	8	0	8
SPC97	8	3	6
YOR192C-A	8	4	9
YDR170W-A	8	1	9
TOR1	8	6	13
YBR096W	8	0	5
EFG1	8	0	1
GLN4	8	2	5
RPB7	8	0	2
PRT1	8	0	7
MPH1	8	1	6
YFL002W-B	8	0	8
YSW1	8	2	2
YLR217W	8	0	7
SMB1	8	2	5
ADE16	8	8	6
HPM1	8	0	2
MPT5	8	20	12
YRF1-4	8	1	9
HSP10	8	0	8
YEL075C	8	0	1
SKG6	8	1	3
CTR86	8	0	5
EFM1	8	3	6
GLG2	8	1	4
BLM10	8	4	5
HOS3	8	0	3
POL2	8	3	7
YPR097W	8	2	7
DOM34	8	1	2
YBR238C	8	0	3
DIG2	8	0	3
SPC110	8	1	3
PRP18	7	0	3
YFR018C	7	2	4
NUP100	7	3	8
NOC4	7	4	7
YOR093C	7	1	6
ENT2	7	0	5
GTO3	7	12	13
ISM1	7	1	8
HBS1	7	0	4
DPB2	7	1	3
SAC1	7	2	5
YTH1	7	0	7
MPH3	7	0	5
HEM1	7	1	7
YFL040W	7	3	9
WHI5	7	0	2
YFL066C	7	0	7
PPS1	7	0	3
SPE2	7	2	7
BNA2	7	0	6
MCM7	7	0	6
RRG1	7	0	6
GDE1	7	1	6
SEE1	7	0	2
GCD11	7	0	5
ESP1	7	1	5
YHL008C	7	11	8
YBR225W	7	8	9
YBL073W	7	0	2
HTS1	7	0	1
REC8	7	0	3
YGR161W-A	7	0	6
ALD5	7	0	6
IQG1	7	1	2
YML131W	7	1	5
KIP1	7	0	5
YHR217C	7	0	5
GUD1	7	0	3
KOG1	7	0	2
GIN4	7	0	7
YHL049C	7	0	2
CDS1	7	29	9
YIR014W	7	0	1
YGR069W	7	0	6
YLR154C-H	6	74275	27287
UTP20	6	7	10
YNR021W	6	1	5
ABP140	6	0	6
MSB2	6	2	6
PRO2	6	1	2
ASP3-2	6	3	7
DBP10	6	1	4
RCO1	6	1	5
MSC2	6	0	6
HUG1	6	0	1
TOM71	6	1	3
DNF3	6	14	9
YER189W	6	0	1
SRB5	6	0	3
SDH2	6	0	3
ROY1	6	4	6
SWI1	6	4	8
NKP1	6	0	2
TCB1	6	1	5
YNL284C-A	6	18	19
KRE2	6	1	5
YMR196W	6	2	6
SMC3	6	0	6
SEN15	6	0	3
YHR182W	6	1	7
CTT1	6	0	5
GSH1	6	1	5
YOR343W-A	6	0	6
STU1	6	7	9
YLR152C	6	0	2
SSF2	6	1	4
EBS1	6	11	6
YNL017C	6	19691	7115
YNR063W	6	0	5
YHR218W	6	0	4
RAD1	6	0	4
CDC9	6	27	26
TOM1	6	5	10
RKM5	6	0	4
TPA1	6	2	5
APT2	6	0	3
POX1	6	0	4
ASP3-1	5	5	9
CHS6	5	3	5
EDC3	5	10	7
YLL066W-B	5	0	4
IME1	5	0	2
ARP8	5	1	2
SPO75	5	2	6
AAT1	5	0	5
SEC39	5	1	3
YHR212W-A	5	0	1
YDR333C	5	2	5
IDH2	5	0	4
LYS14	5	0	5
TCP1	5	1	5
GLO3	5	0	3
YPL088W	5	0	3
SWE1	5	1	4
SSN2	5	5	7
DIT2	5	0	4
MDM12	5	1	2
PUF3	5	2	6
PCL8	5	1	3
KNS1	5	0	3
PTK2	5	2	4
SNL1	5	0	2
BNA5	5	0	3
PAN6	5	4	5
YLR462W	5	0	1
CDC25	5	7	11
ECI1	5	1	2
VPS38	5	1	5
YFL042C	5	3	6
CAT8	5	3	5
IRC7	5	0	5
RAD24	5	4	6
ROM1	5	1	5
ALG11	5	2	5
PDR1	5	3	7
NRP1	5	2	4
RAD16	5	0	3
OXP1	5	0	3
PAB1	5	0	3
VPS17	5	0	1
YOR1	5	0	4
FTH1	5	1	4
SMY1	5	2	5
TIM11	5	0	1
SLH1	5	1	6
YDR544C	5	0	5
PFK26	5	1	5
GND2	5	3	4
HXT8	5	3	6
POL5	5	1	5
POL4	5	0	3
Q0255	5	0	5
DBP7	5	0	3
HLR1	5	0	4
ALG8	5	1	3
YPL216W	5	7	8
TEC1	5	0	4
HAL5	5	0	1
AIM14	5	0	2
TYW1	5	0	5
SSE2	5	0	1
CRT10	5	1	5
YCR025C	5	0	1
GUF1	5	2	6
INP1	4	0	4
RIC1	4	6	9
YLR253W	4	1	4
MRPL50	4	8	6
BUD27	4	0	4
ART5	4	5	5
GRR1	4	0	2
SKT5	4	7	7
ZIP2	4	0	2
MSL5	4	0	2
ISW2	4	0	2
YLR352W	4	0	3
YLR312C	4	0	2
BUD16	4	0	4
YLR159W	4	0	4
ULP2	4	0	3
NCE101	4	1	3
VHS3	4	0	4
ENT1	4	1	3
GDB1	4	13	6
MSC1	4	2	4
GAL4	4	4	6
YLR157W-E	4	0	3
CSM3	4	0	2
NUP116	4	8	9
RAP1	4	0	2
LAP2	4	2	6
USO1	4	2	5
RAV1	4	2	5
PSF1	4	0	3
PCL9	4	3	6
YAK1	4	2	5
SWI4	4	0	4
BRR1	4	0	4
GIP3	4	3	7
EXO1	4	1	5
YBR219C	4	3	5
SAS3	4	3	5
TNA1	4	0	1
NAN1	4	0	1
SAE2	4	3	7
TRM5	4	34	17
RPL1A	4	4	4
GEA2	4	0	2
OSH7	4	0	4
CNS1	4	1	4
TDA1	4	0	4
YRM1	4	5	6
RRM3	4	0	2
YML034C-A	4	0	1
IRR1	4	1	4
DMC1	4	1	3
DBP5	4	1	2
PHO23	4	12	3
SSK2	4	1	4
IRC20	4	13	10
SML1	4	0	1
TRS23	4	0	2
IRC10	4	0	3
YLR422W	4	3	6
VPS1	4	0	3
SLI1	4	3	6
NGL2	4	4	6
SAG1	4	1	4
ARO9	4	0	1
BTS1	4	0	2
YPL025C	4	12	6
ASI1	4	1	5
YEL077C	4	2	5
VAM7	4	1	3
SEF1	4	8	7
ADA2	4	0	3
PRD1	4	0	4
MGA2	4	1	5
PAP2	4	0	4
RTC4	4	0	2
YCL002C	4	0	2
TFC4	4	11	12
YNL266W	4	0	1
YHL050C	4	0	2
YJL182C	4	0	2
YRF1-2	4	0	4
FMP10	4	0	2
PRE5	4	1	5
GPI18	4	3	6
NFS1	4	0	3
SOG2	4	0	3
PGC1	4	0	3
SWC5	4	23	8
REG1	4	2	4
YOR015W	4	0	2
RIX1	4	0	4
NGG1	4	6	7
FOX2	4	5	7
CAF4	4	1	4
SSY5	4	0	3
RAD61	4	1	4
MUD2	4	3	5
YGR125W	4	1	4
YOR314W	4	0	3
FBP26	4	2	4
SGD1	4	1	4
KTR1	4	2	6
NHA1	4	0	4
PTP2	4	1	5
RRP5	4	3	6
SSD1	4	12	8
CET1	4	0	2
REG2	4	2	5
YLL066C	4	0	4
MKK1	4	2	3
YMR144W	4	0	4
ARO80	4	1	5
NIP100	4	0	3
SAP155	4	1	4
MSR1	4	1	4
RIM20	4	0	2
MDL1	4	2	6
YER172C-A	4	0	2
YLR154W-F	4	70	50
UTP4	4	3	5
ORC4	4	0	2
TOK1	3	1	3
END3	3	0	3
ERR3	3	0	1
YKU80	3	0	3
ASP3-4	3	8	9
YMR187C	3	0	3
YIL166C	3	0	3
PDR10	3	1	4
YEL025C	3	1	4
RPC53	3	1	2
SEC72	3	0	2
UME6	3	3	4
YGL114W	3	4	5
AGC1	3	2	5
ZIP1	3	4	6
BSC4	3	0	2
YPC1	3	0	3
ECM31	3	0	1
BOP3	3	0	3
GAR1	3	0	2
YOL037C	3	0	3
MDL2	3	0	2
YLL032C	3	4	4
SKG1	3	1	4
GIS2	3	0	1
DPH5	3	0	2
ERG12	3	0	3
HEF3	3	1	4
YPL150W	3	8	7
GAB1	3	1	4
UMP1	3	0	2
RAD50	3	8	9
CEP3	3	0	3
TRS130	3	1	3
YLR157W-D	3	0	3
AVT7	3	23	13
PUG1	3	0	3
DPB11	3	1	4
DRS1	3	1	4
OAF1	3	2	5
SRB8	3	1	4
NOP13	3	0	1
RPB5	3	0	2
BFR1	3	0	3
YBR285W	3	0	2
AKL1	3	3	4
OAF3	3	9	10
YBR099C	3	0	1
PUF4	3	5	7
OCA5	3	0	3
VID28	3	5	6
IMH1	3	2	5
RIM15	3	6	8
YJL113W	3	0	3
MBP1	3	1	3
TRM3	3	2	5
YPL113C	3	0	2
RIF1	3	5	8
PET112	3	6	2
RNR3	3	1	2
YJR008W	3	3	6
YSC83	3	0	2
YBR220C	3	0	3
CNA1	3	0	3
NCR1	3	1	4
MSY1	3	0	2
PIK1	3	1	4
YDR222W	3	1	3
MNL1	3	2	5
MDM36	3	1	4
WHI3	3	1	4
HAP1	3	37	24
RIA1	3	1	4
STE7	3	0	3
YLL067C	3	0	2
PRK1	3	3	3
VTC4	3	0	3
PET111	3	0	3
YPR091C	3	1	3
HFA1	3	1	4
NOT5	3	0	3
YAP1802	3	0	1
YAP1801	3	1	4
SPG5	3	0	3
DUN1	3	0	1
YLL007C	3	0	2
YBL100W-A	3	3	5
MLH1	3	1	4
SFA1	3	1	4
MIS1	3	0	2
CDC28	3	0	3
LEU3	3	2	5
SRT1	3	0	3
CLB2	3	0	3
YIL100C-A	3	13	11
ERR1	3	0	1
PAM1	3	3	6
VPS8	3	1	4
RET1	3	0	3
ARO2	3	0	3
BNA3	3	1	3
[truncated: 7,728 more rows]
[truncated: 4 more columns]
