# Supplementary material for: Global analysis of transcriptionally engaged yeast RNA polymerase III reveals extended tRNA transcripts
Source: HighWire-hosted journal article supplement (doi:10.1101/gr.205492.116), 2016-05-20
Supplement: Supplemental_Table_S2.xlsx [file Supplemental_Table_S2.xlsx]

## Sheet: Sheet1
Supplemental Table S2 Turowski et al.
chr	start	stop	strand	temp name (in gtf file)	gene name	indicative length
chrIV	130187	130245	-	put8	TLT1	58
chrV	167259	167331	-	put13	TLT2	72
chrVII	555229	555300	+	put18	TLT3	71
chrX	139990	140064	-	put26	TLT4	74
chrXI	618546	618614	-	put32	TLT5	68
chrXII	489753	490543	-	put44	TLT6	790
