# Supplementary material for: Global analysis of transcriptionally engaged yeast RNA polymerase III reveals extended tRNA transcripts
Source: HighWire-hosted journal article supplement (doi:10.1101/gr.205492.116), 2016-05-20
Supplement: Supplemental_Table_S3.xlsx [file Supplemental_Table_S3.xlsx]

## Sheet: Sheet1
Supplemental Table S3 Turowski et al.
gene_name	av glu	av gly	gly/glu	maf1d/wt
RNA170	72.5	6635.67	91.5264	0.778771
SNR189	152	3121.67	20.5373	0.0842928
SNR161	55.25	872.667	15.7949	0.0828033
SNR80	43.25	479.667	11.0906	0.0116813
SNR61	80.5	892	11.0807	0.183681
SNR17A	106	929.667	8.77044	0.578313
SNR86	328	2816.33	8.58638	0.531232
SNR30	116.25	785.333	6.75556	0.257755
SNR55	116	772.333	6.65805	0.19637
SNR190	164.5	925	5.6231	0.169402
SNR3	124.75	687.333	5.50969	0.435924
TLC1	15.5	78	5.03226	0.909091
LSR1	101.75	491	4.82555	0.558491
YLL017W	77.5	207	2.67097	0.585265
SNR63	34.5	88.6667	2.57005	0.329218
SNR37	94	197	2.09574	0.332472
SNR6	8915.25	17094.7	1.91746	0.888335
SCR1	19285	36935	1.91522	0.599944
RPR1	6177.5	8767	1.41918	0.704315
SNR40	130.5	180.333	1.38186	0.837162
SNR64	38	38.3333	1.00877	1.12184
SNR52	4885.5	4469.33	0.914816	1.03083
SNR60	29	0	0	0.814815
